# Supplementary material for: ZnO nanoarrays via a thermal decomposition–deposition method for sensitive and selective NO2 detection
Source: Royal Society of Chemistry journal article supplement (doi:10.1039/d1ce00410g), 2021-01-01
Supplement: d1ce00410g1.pdf [file d1ce00410g1.pdf]

## Supporting Information

### **ZnO Nanoarrays via a Thermal Decomposition-Deposition Method for Sensitive and Selective NO<sub>2</sub> detection**

*Chengming Lou<sup>a</sup>, Kai Wang<sup>a</sup>, Houshan Mei<sup>a</sup>, Jiayue Xie<sup>a</sup>, Wei Zheng<sup>a</sup>,  
Xianghong Liu<sup>a,b</sup>, Jun Zhang<sup>a\*</sup>*

*<sup>a</sup>College of Physics, Center for Marine Observation and Communications,*

*Qingdao University, Qingdao 266071, China*

*<sup>b</sup>Key Laboratory of Advanced Energy Materials Chemistry (Ministry of*

*Education), Nankai University, Tianjin 300071, China*

Corresponding authors. Dr. Jun Zhang, E-mail: [jun@qdu.edu.cn](mailto:jun@qdu.edu.cn)

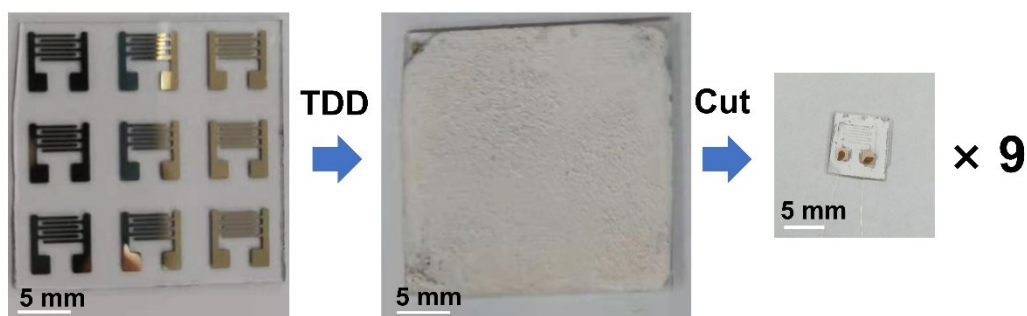

**Figure S1.** The growth of self-assembled ZnO nanoarrays on a large area substrate.

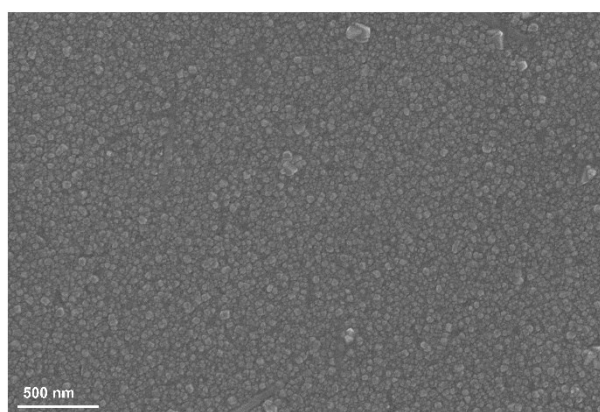

**Figure S2.** The SEM image of dense ZnO film deposited by ALD.

### **Preparation of dense ZnO films**

The dense ZnO film was grown on SiO<sub>2</sub>/Si wafer by atomic layer deposition (ALD). Diethyl zinc (DEZn) and H<sub>2</sub>O were used as the precursor for Zn and O. In order to prevent condensation of the precursors during the purging process, the temperature of the feed container was set to 150 °C. The substrate temperature was also set as 150 °C. DEZn and H<sub>2</sub>O were fed into the ALD reactor in sequence with a typical pulse times of 0.02 and 0.1 s. Both of the exposure times were set as 8 s. The high purity nitrogen (99.999%) purge time between the sequential pulses was 25 s. After 150 ALD cycles, the ZnO film was obtained. Then the dense ZnO film was annealed at 500 °C for 2 h with the heating rate of 10 °C/min in air.

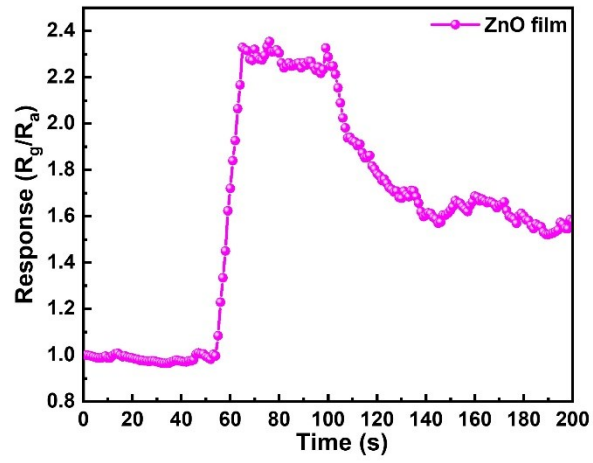

**Figure S3.** The response of dense ZnO film to 10 ppm NO<sub>2</sub> at 140 °C.
